# Supplementary material for: A study of the superior electrochemical performance of 3 nm SnO2 nanoparticles supported by graphene
Source: Royal Society of Chemistry journal article supplement (doi:10.1039/c3ta14745b), 2014-01-01
Supplement: c3ta14745b1.pdf [file c3ta14745b1.pdf]

# Supporting information

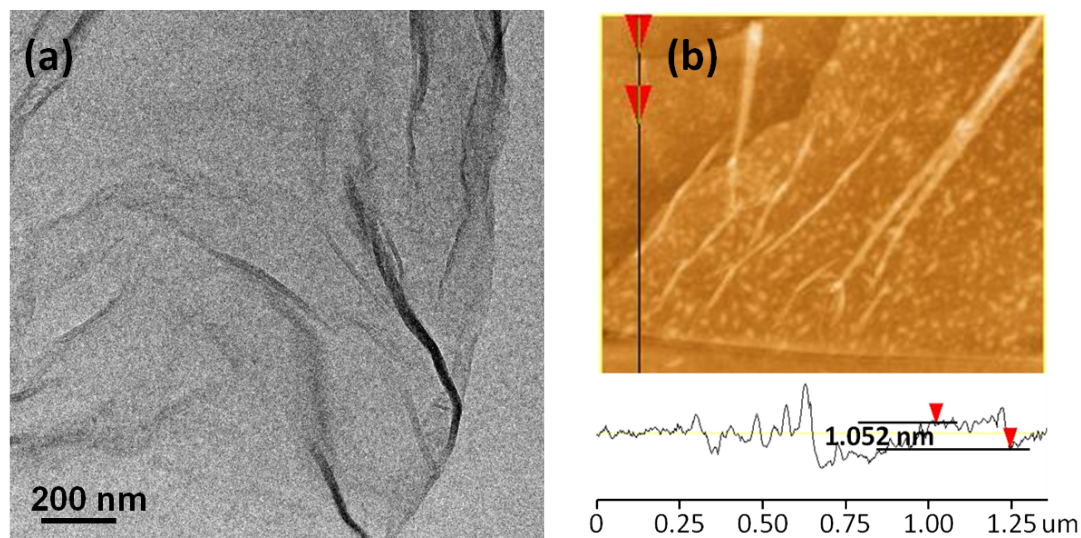

Figure S1. (a) TEM and (b) AFM of as-obtain GO.

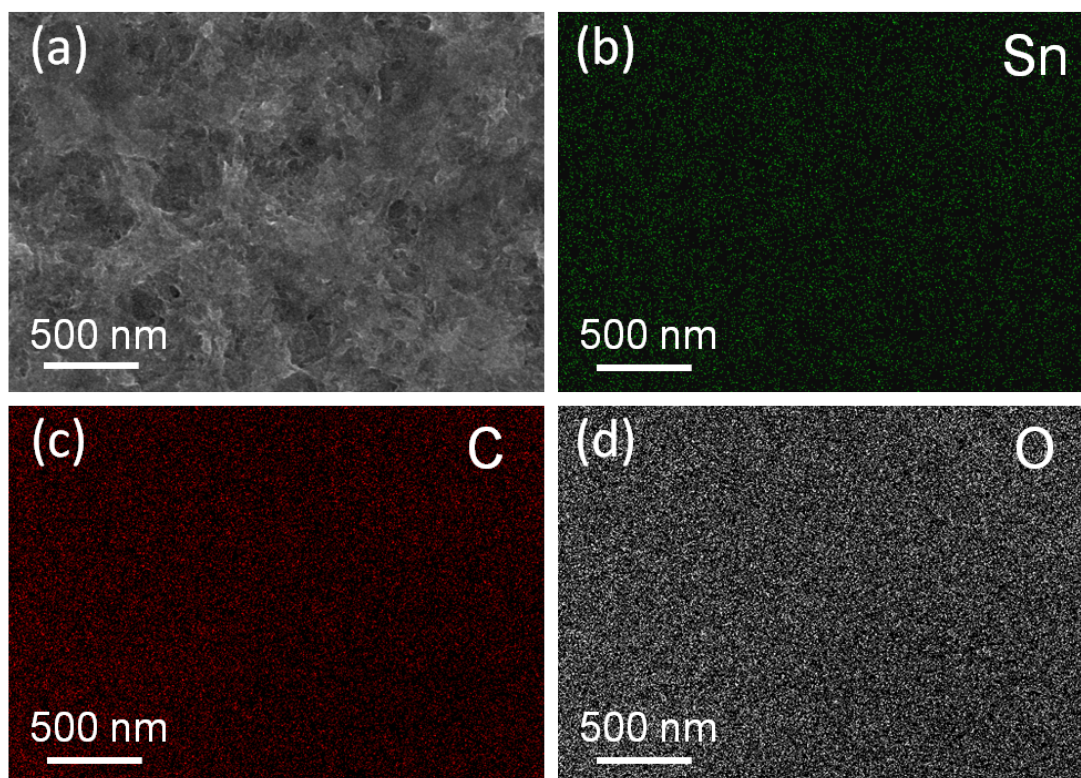

Figure S2. (a) SEM image of SnO<sub>2</sub>/G and corresponding EDS mapping showing the relative intensities of (b) tin, (c) carbon, and (d) oxygen.

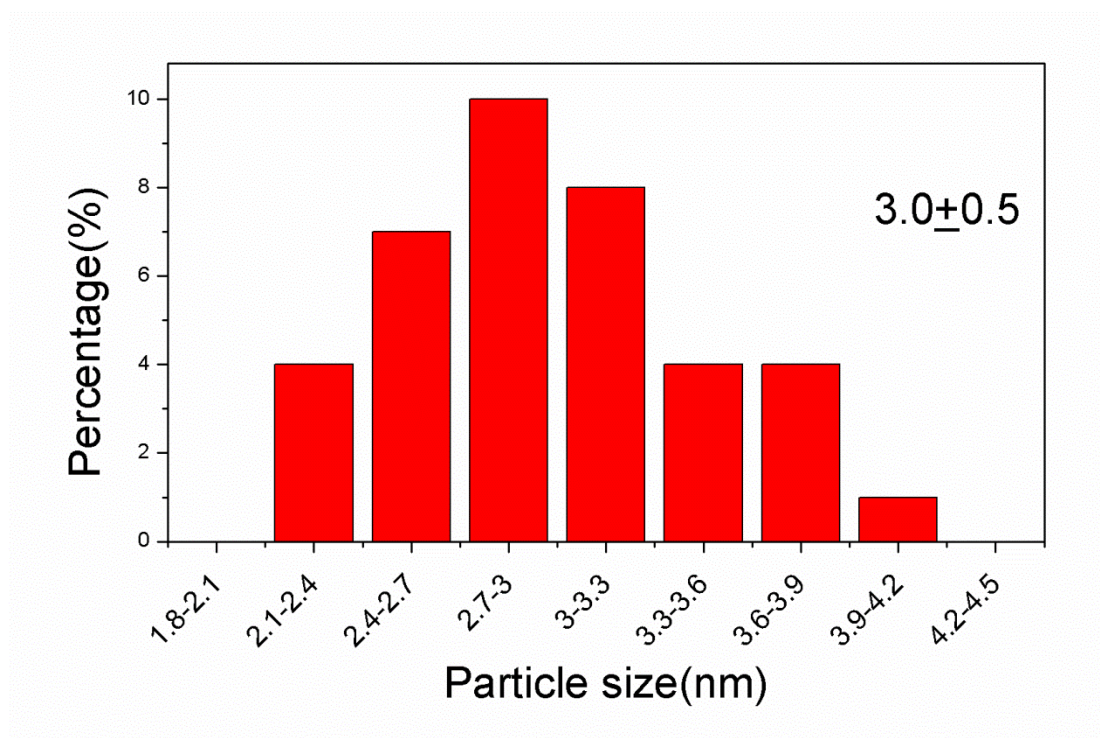

Figure S3. Particle size distribution of SnO<sub>2</sub> nanoparticles in SnO<sub>2</sub>/G composite.

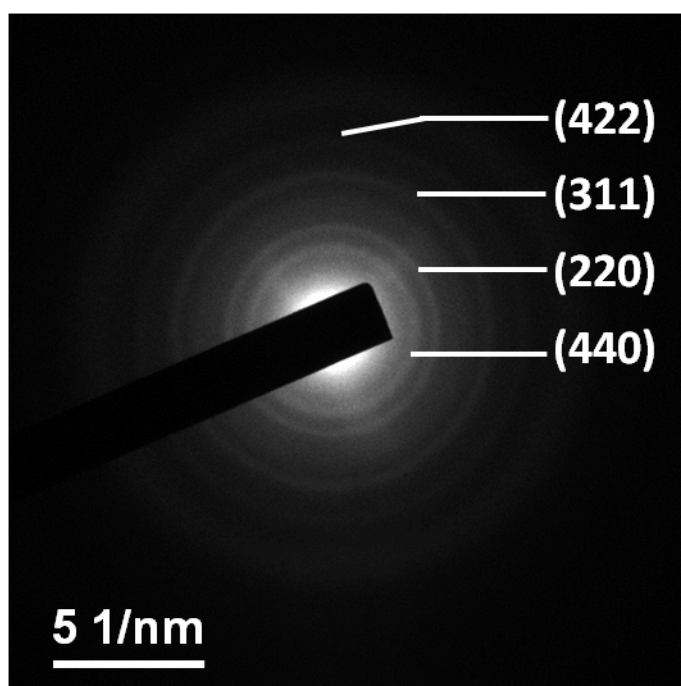

Figure S4. Selected area electron diffraction pattern of SnO<sub>2</sub>/G composite.

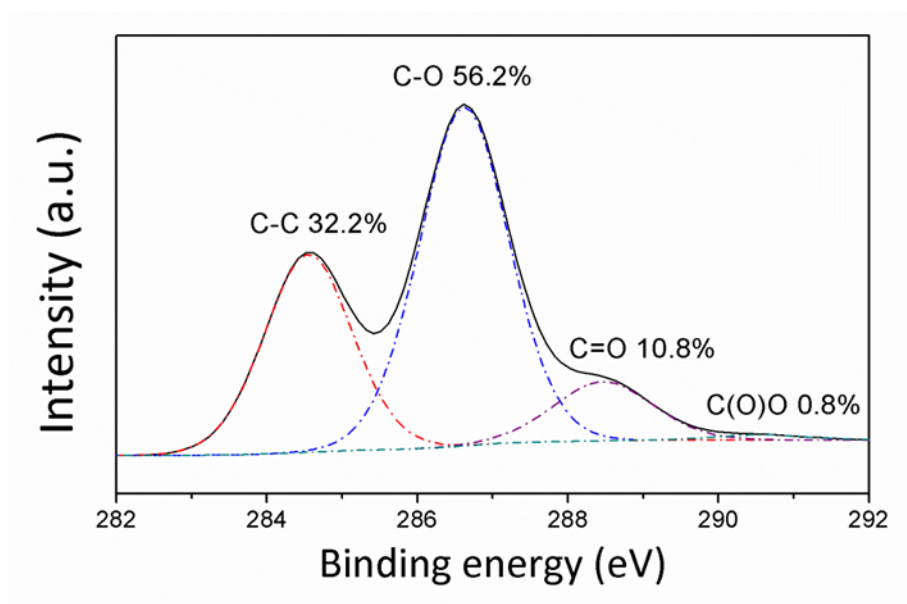

Figure S5. High resolution XPS spectrum of C 1s from GO.

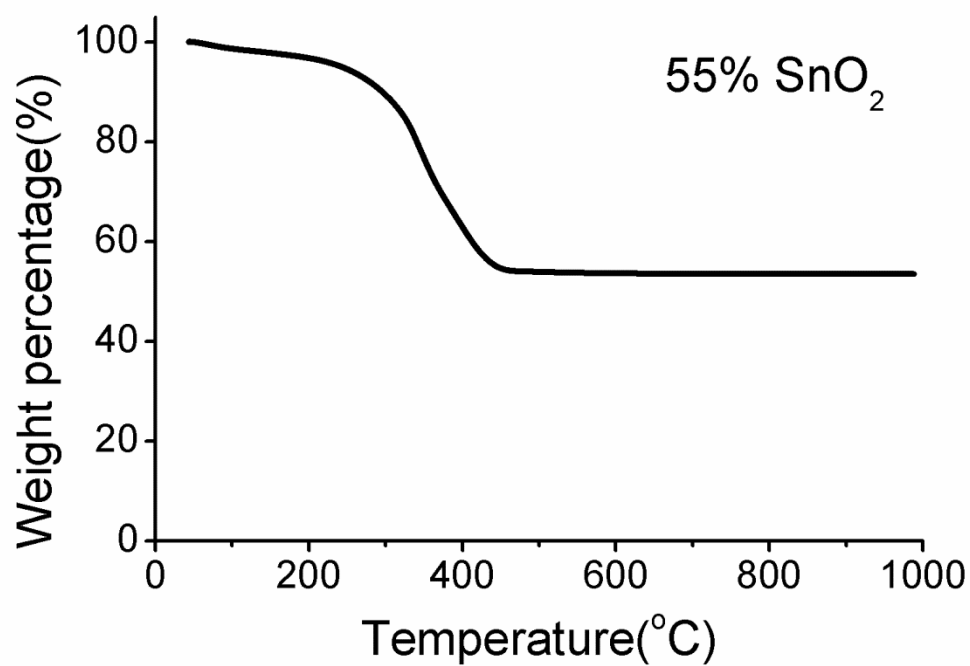

Figure S6. TGA curve of SnO<sub>2</sub>/G composite.

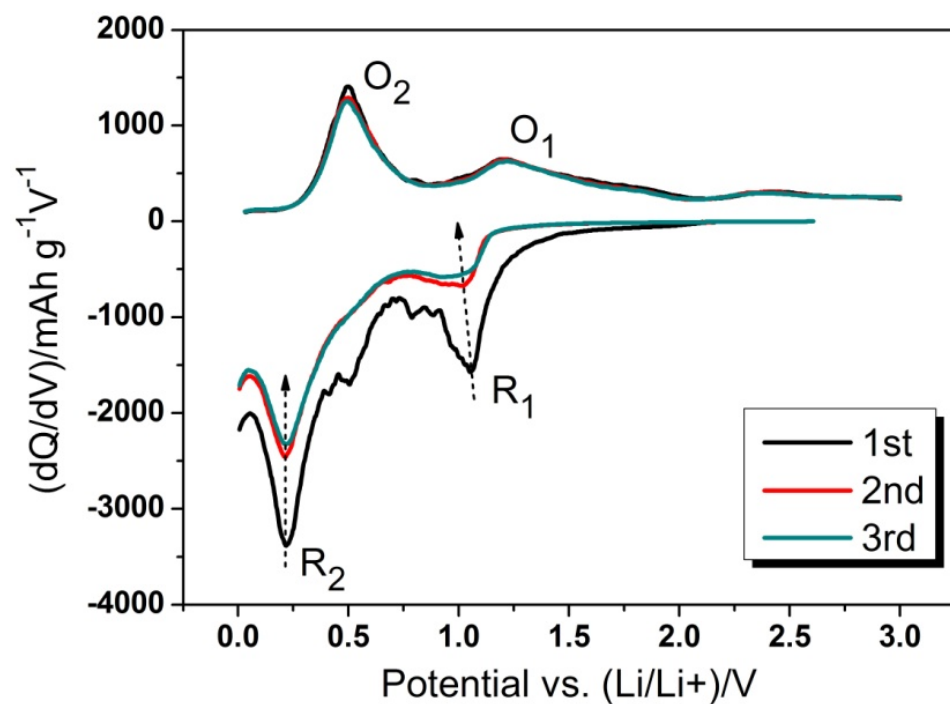

Figure S7.  $dQ/dV$  plots of the initial 3 charge/discharge cycles of  $\text{SnO}_2/\text{G}$  based on the results obtained from Figure 3(a).

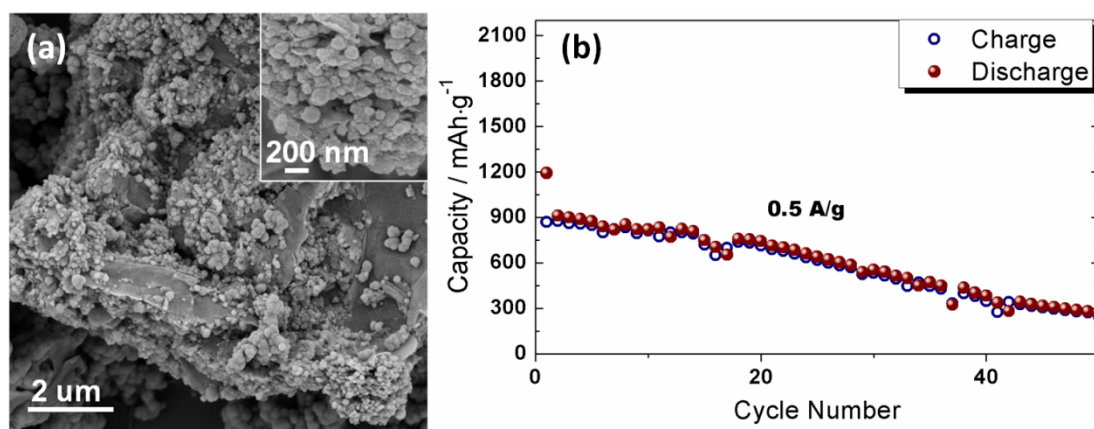

Figure S8. (a) SEM images and (b) electrochemical performances of large  $\text{SnO}_2/\text{G}$  anode.

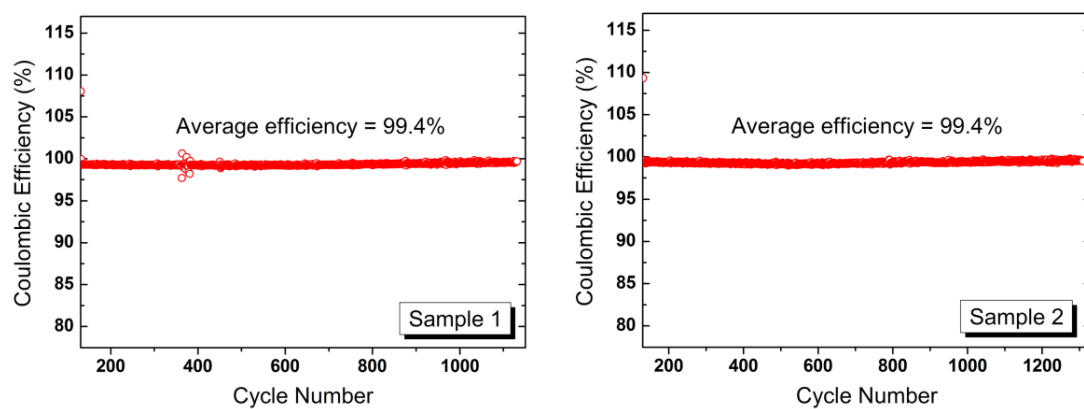

Figure S9. Coulombic efficiency of SnO<sub>2</sub>/G electrode from 131<sup>th</sup> to extending cycles under a current density of 2A·g<sup>-1</sup>. The data are based on Figure 3c and 3d.
